# Supplementary material for: Artificial Intelligence and Computer Aided Diagnosis in Chronic Low Back Pain: A Systematic Review
Source: MDPI journal article supplement (doi:10.3390/ijerph19105971), 2022-05-14
Supplement: s1 [file s1]

Table S1: Summary of the methodological quality of the included studies regarding the 4 domains (D1, D2, D3, and D4) assessing the risk of bias of the QUADAS-2 score

| Study                 | D1      | D2   | D3      | D4      |
|-----------------------|---------|------|---------|---------|
| Lewandrowski 2020     | Unclear | Low  | Low     | Low     |
| Gao 2020              | Low     | Low  | Low     | Low     |
| Ruiz-Espana 2015      | Low     | Low  | Low     | Low     |
| Oktay 2014            | Unclear | Low  | Low     | Unclear |
| Alomari 2010          | Unclear | Low  | Low     | Unclear |
| Koh 2012              | Low     | Low  | Low     | Unclear |
| Tsai 2021             | Low     | Low  | Low     | Low     |
| Pan 2021              | Unclear | Low  | Low     | Low     |
| Sustersic 2020        | High    | Low  | Low     | Low     |
| Oyedotun 2016         | High    | High | High    | Unclear |
| Jamaludin 2017a       | Unclear | Low  | High    | Low     |
| Jamaludin 2017b       | Low     | Low  | Low     | High    |
| Lehnen 2021           | Low     | Low  | Low     | Low     |
| Han 2018              | High    | Low  | High    | High    |
| Huber 2009            | High    | Low  | Low     | Low     |
| Hallinan 2021         | Unclear | Low  | Low     | Low     |
| Veronezi 2011         | Unclear | Low  | Low     | Low     |
| Adankon 2012          | Unclear | Low  | Low     | Low     |
| Lin 2007              | Unclear | Low  | Low     | Unclear |
| Lee 2019              | Low     | High | High    | Low     |
| Lamichhane 2021a      | High    | High | High    | Low     |
| Lamichhane 2021b      | High    | High | High    | Low     |
| Shen 2019             | High    | High | High    | Low     |
| Mathew 1998           | Unclear | Low  | Unclear | Low     |
| Staartjes 2020        | High    | Low  | Low     | Low     |
| Parsaeian 2012        | Low     | Low  | High    | Unclear |
| Caza-Szoka 2016       | High    | Low  | High    | Low     |
| Liew 2020             | High    | Low  | High    | Low     |
| Abdollahi 2020        | High    | Low  | High    | Low     |
| Bishop 1997           | Low     | Low  | High    | Low     |
| Hu 2018               | High    | Low  | High    | Low     |
| Ashouri 2017          | High    | Low  | High    | Low     |
| Karabulut 2014        | High    | Low  | Unclear | Unclear |
| Ketola 2020           | High    | Low  | Unclear | Low     |
| Torrado-Carvajal 2021 | High    | Low  | High    | Low     |
| Sanders 2000          | Low     | Low  | High    | Low     |

Table S1 (continuing)

|                  |         |      |      |         |
|------------------|---------|------|------|---------|
| Pang 2019        | High    | Low  | Low  | Low     |
| Neubert 2014     | High    | Low  | Low  | Low     |
| Niemeyer 2021    | Low     | Low  | Low  | Unclear |
| Sneath 2021      | Low     | Low  | Low  | Low     |
| Natalia 2020     | Low     | Low  | Low  | Unclear |
| Sari 2012        | High    | Low  | High | Low     |
| Fortin 2017      | Low     | Low  | Low  | Low     |
| Chae 2020        | Low     | Low  | Low  | Low     |
| Watanabe 2019    | Low     | Low  | Low  | Low     |
| Cho 2020         | High    | Low  | Low  | Low     |
| Garcia-Cano 2018 | High    | Low  | Low  | High    |
| Salehi 2019      | Unclear | Low  | Low  | Unclear |
| Won 2020         | Low     | Low  | Low  | Low     |
| Beulah 2021      | Unclear | Low  | Low  | Unclear |
| Sundarsingh 2020 | Unclear | Low  | Low  | Unclear |
| Rankovic 2015    | Unclear | High | High | Unclear |
| Zhao 2019        | High    | Low  | Low  | High    |
| Varcin 2019      | Unclear | Low  | Low  | Unclear |
| Varcin 2021      | Low     | Low  | Low  | Low     |
| Wang 2019        | High    | Low  | Low  | Low     |
| Nguyen 2021      | Low     | Low  | Low  | Low     |

Table S2: Summary of the methodological quality of the included studies regarding the 3 domains (D1, D2, and D3) assessing the applicability concerns of the QUADAS-2 score

| Study                 | D1      | D2   | D3      |
|-----------------------|---------|------|---------|
| Lewandrowski 2020     | Low     | Low  | Low     |
| Gao, 2020             | Low     | Low  | Low     |
| Ruiz-Espana, 2015     | Low     | Low  | Low     |
| Oktay, 2014           | Unclear | Low  | Low     |
| Alomari 2010          | Unclear | Low  | Low     |
| Koh 2012              | Low     | Low  | Low     |
| Tsai 2021             | High    | Low  | Low     |
| Pan 2021              | Unclear | Low  | Low     |
| Sustersic 2020        | Low     | Low  | Low     |
| Oyedotun 2016         | Low     | High | High    |
| Jamaludin 2017a       | Low     | Low  | Low     |
| Jamaludin 2017b       | Low     | Low  | Low     |
| Lehnen 2021           | Low     | Low  | Low     |
| Han 2018              | Unclear | Low  | Low     |
| Huber 2009            | Low     | Low  | Low     |
| Hallinan 2021         | Unclear | Low  | Low     |
| Veronezi 2011         | Unclear | Low  | Low     |
| Adankon 2012          | Low     | Low  | Low     |
| Lin 2007              | High    | Low  | Low     |
| Lee 2019              | Low     | Low  | High    |
| Lamichhane 2021a      | Low     | Low  | High    |
| Lamichhane 2021b      | Low     | Low  | High    |
| Shen 2019             | Low     | Low  | High    |
| Mathew 1998           | Low     | Low  | Low     |
| Staartjes 2020        | Unclear | Low  | Low     |
| Parsaeian 2012        | High    | Low  | High    |
| Caza-Szoka 2016       | Low     | Low  | High    |
| Liew 2020             | Low     | Low  | High    |
| Abdollahi 2020        | Low     | Low  | High    |
| Bishop 1997           | Low     | Low  | High    |
| Hu 2018               | Low     | Low  | High    |
| Ashouri 2017          | Low     | Low  | High    |
| Karabulut 2014        | Low     | Low  | Unclear |
| Ketola 2020           | High    | Low  | Low     |
| Torrado-Carvajal 2021 | Low     | Low  | Low     |
| Sanders 2000          | Low     | Low  | High    |

Table S2 (continuing)

|                  |         |      |      |
|------------------|---------|------|------|
| Pang 2019        | Low     | Low  | Low  |
| Neubert 2014     | High    | Low  | Low  |
| Niemeyer 2021    | Low     | Low  | Low  |
| Sneath 2021      | High    | Low  | Low  |
| Natalia 2020     | Low     | Low  | Low  |
| Sari 2012        | Low     | Low  | High |
| Fortin 2017      | Low     | Low  | Low  |
| Chae 2020        | Unclear | Low  | Low  |
| Watanabe 2019    | High    | Low  | Low  |
| Cho 2020         | Low     | Low  | Low  |
| Garcia-Cano 2018 | High    | Low  | Low  |
| Salehi 2019      | Unclear | Low  | Low  |
| Won 2020         | Unclear | Low  | Low  |
| Beulah 2021      | Unclear | Low  | Low  |
| Sundarsingh 2020 | Unclear | Low  | Low  |
| Rankovic 2015    | Unclear | High | High |
| Zhao 2019        | Unclear | Low  | Low  |
| Varcin 2019      | Unclear | Low  | Low  |
| Varcin 2021      | Low     | Low  | Low  |
| Wang 2019        | Low     | Low  | Low  |
| Nguyen 2021      | Low     | Low  | Low  |
